# Supplementary material for: Cross-cultural adaptation, reliability, and validity of a Chinese version of the pelvic girdle questionnaire
Source: Springer Nature journal article supplement (doi:10.1186/s12884-021-03962-8), 2021-06-30
Supplement: MOESM1 [file 19315710]

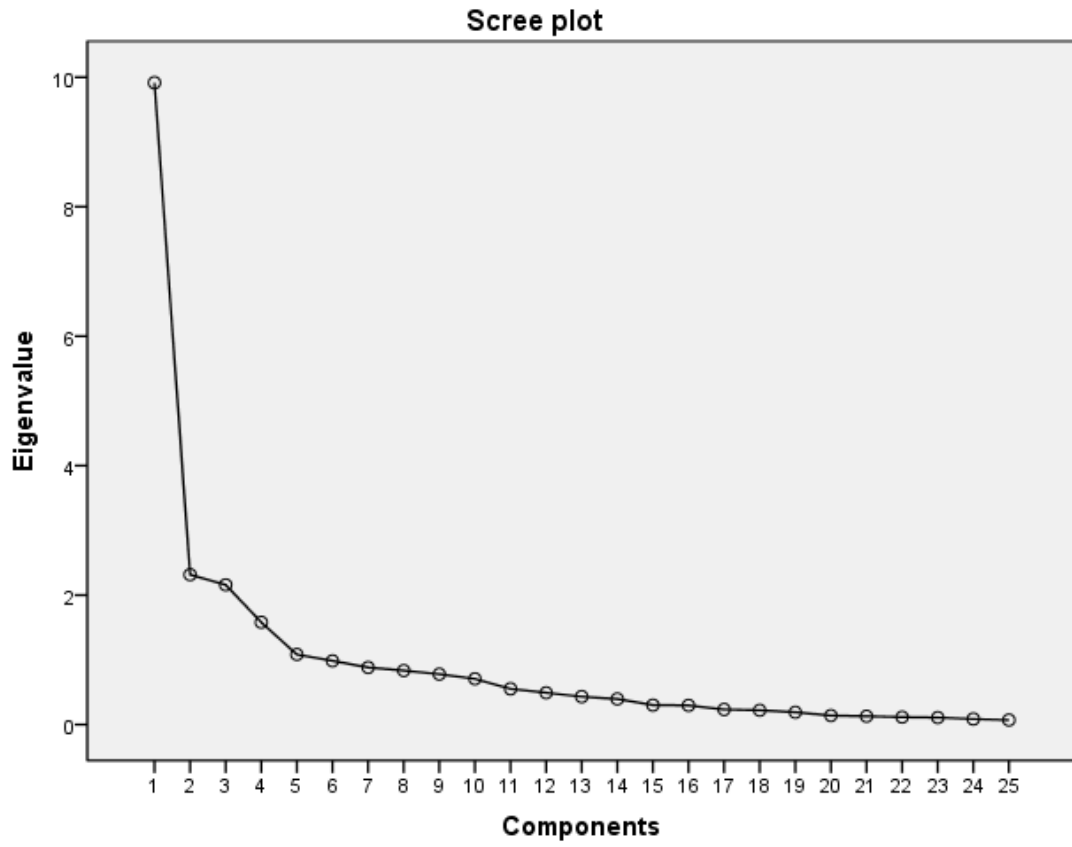

**Supplementary Figure 1:** A scree plot showing distribution of factors by their eigenvalues.
