# Supplementary material for: Cross-cultural adaptation, reliability, and validity of a Chinese version of the pelvic girdle questionnaire
Source: Springer Nature journal article supplement (doi:10.1186/s12884-021-03962-8), 2021-06-30
Supplement: MOESM2 [file 19315710]

**Supplementary Table 1.** AUC value for the ability to discriminate between pregnancy and the post-partum state.

|                    | p value | AUC (95% CI)        |
|--------------------|---------|---------------------|
| PGQ total score    | 0.824   | 0.488 (0.388-0.589) |
| PGQ activity score | 0.765   | 0.484 (0.384-0.585) |
| PGQ symptom score  | 0.943   | 0.504 (0.403-0.605) |

**Supplementary Table 2.** Forced solution with three components and Rotated Total explained variance of Factor analysis.

| Component | Extractions sums of Squared loading |              |                 | Rotation sums of Squared loading |
|-----------|-------------------------------------|--------------|-----------------|----------------------------------|
|           | Total                               | Variance (%) | Accumulated (%) | Total                            |
| 1         | 9.915                               | 39.661       | 39.661          | 6.308                            |
| 2         | 2.316                               | 9.264        | 48.925          | 5.485                            |
| 3         | 2.159                               | 8.635        | 57.560          | 2.597                            |
